# Supplementary material
Source: publisher figshare collection journal article supplement (https://karger.figshare.com/articles/dataset/_/8545289)
Supplement: Supplementary file 1 [file 1]

## **Supplemental Material**

### **Supplemental Figure Legends**

**Figure S1. ALTOLD study recruitment criteria and participant flow chart.**

**Figure S2. MDRD study recruitment criteria and participant flow chart.**

**Figure S3. AASK study recruitment criteria and participant flow chart.**

**Figure S4. CRIC study recruitment criteria and participant flow chart.**

## Sample SPSS Analysis Scripts

### OLS Regression in MDRD

```
REGRESSION  
/MISSING LISTWISE  
/STATISTICS COEFF OUTS CI(95) R ANOVA  
/CRITERIA=PIN(.05) POUT(.10)  
/NOORIGIN  
/DEPENDENT LN_Fractional_change  
/METHOD=ENTER Sq_percent_delta_GFR delta_sysBP interaction ACEiremoved ACEiadded  
DietGr_one DietGr_two.
```

#### Variables

LN\_Fractional\_change; *log transformed fractional change in permeability*  
Sq\_percent\_delta\_GFR; *square of the percentage change in GFR*  
delta\_sysBP; *change in systolic BP*  
interaction; *product of change in systolic BP and (percentage reduction in GFR)<sup>2</sup>*  
ACEiremoved; *ACEi or ARB use discontinued between baseline and final assessment*  
ACEiadded; *ACEi or ARB use commenced between baseline and final assessment*  
DietGr\_one; *randomized to commence low protein diet after baseline assessment*  
DietGr\_two; *randomized to commence very low protein diet after baseline assessment*

### ALTOLD Repeated Measures Analysis

```
GLM Ln_ACR_per_GFRT0 Ln_ACR_per_GFRT6 Ln_ACR_per_GFRT12 Ln_ACR_per_GFRT24  
Ln_ACR_per_GFRT36  
/WSFACTOR=Time 5 Polynomial  
/MEASURE=Ln_ACR_per_GFR  
/METHOD=SSTYPE(3)  
/PLOT=PROFILE(Time)  
/EMMEANS=TABLES(Time) COMPARE ADJ(BONFERRONI)  
/PRINT=DESCRIPTIVE ETASQ  
/CRITERIA=ALPHA(.05)  
/WSDESIGN=Time.
```

#### Variables

LN\_ACR\_per\_GFRT0, ...T6, ...T12, ...T24, ...T36; *log-transformed (ACR/GFR) at time 0, 6, 12, 24, 36m*
